# Supplementary material for: Highly efficient DNA-free gene disruption in the agricultural pest Ceratitis capitata by CRISPR-Cas9 ribonucleoprotein complexes
Source: PubMed Central journal article supplement (PMC5577161; doi:10.1038/s41598-017-10347-5), 2017-08-30
Supplement: 41598_2017_10347_MOESM1_ESM.pdf [file 41598_2017_10347_MOESM1_ESM.pdf]

Supplementary Materials for

**Highly efficient DNA-free gene disruption in the agricultural pest *Ceratitidis capitata* by CRISPR-Cas9 ribonucleoprotein complexes**

Angela Meccariello<sup>1</sup>, Simona Maria Monti<sup>2</sup>, Alessandra Romanelli<sup>3</sup>, Rita Colonna<sup>1</sup>,  
Pasquale Primo<sup>1</sup>, Maria Grazia Inghilterra<sup>1</sup>, Giuseppe Del Corsano<sup>1</sup>, Antonio  
Ramaglia<sup>4</sup>, Giovanni Iazzetti<sup>1</sup>, Antonia Chiarore<sup>5</sup>, Francesco Patti<sup>5</sup>, Svenia D.  
Heinze<sup>6</sup>, Marco Salvemini<sup>1</sup>, Helen Lindsay<sup>6,7</sup>, Elena Chiavacci<sup>6</sup>, Alexa Burger<sup>6</sup>, Mark  
D. Robinson<sup>6,7</sup>, Christian Mosimann<sup>6</sup>, Daniel Bopp<sup>6</sup> and Giuseppe Saccone<sup>1,\*</sup>

\*correspondence to: [giuseppe.saccone@unina.it](mailto:giuseppe.saccone@unina.it)  
Supplementary Tables 1- 5  
Supplementary Fig. 1

| Cas9<br>μg/μl | Injected<br>embryos | Larvae/<br>Embryos | Pupae/<br>Larvae | Adults/<br>Pupae | Adults/<br>Embryos |
|---------------|---------------------|--------------------|------------------|------------------|--------------------|
| 0             | 114                 | 0.56 (64)          | 0.84 (54)        | 0.66 (36)        | 0.31 (36)          |
| 0.9           | 150                 | 0.59 (88)          | 0.37 (33)        | 0.82 (27)        | 0.18 (27)          |
| 1.8           | 110                 | 0.57 (63)          | 0.49 (31)        | 0.68 (31)        | 0.28 (31)          |
| 3.6           | 134                 | 0.51 (69)          | 0.41 (28)        | 0.71 (20)        | 0.15 (20)          |

**Supplementary Table 1: Survival rates after injecting recombinant Cas9 protein into embryos.**

Numbers represent the percentage of survivors (actual number in parentheses) for a given specific developmental stage relative to number of individuals of the preceding stage. The last column is the adult survival rate with the respect of the injected embryos.

| Cas9<br>μg/μl | sgRNA<br>0.2<br>μg/μl   | Injected<br>embryos | Larvae/<br>Embryos | Pupae/<br>Larvae | Adults/<br>Pupae | Adults/<br>Embryos | Somatic<br>mosaics |
|---------------|-------------------------|---------------------|--------------------|------------------|------------------|--------------------|--------------------|
| 1.8           | <i>we-g1</i>            | 240                 | 0.56 (134)         | 0.33 (34)        | 0.18 (6)         | 0.02 (6)           | 0.5 (3)            |
| 1.8           | <i>we-g2</i>            | 180                 | 0.44 (80)          | 0.36 (29)        | 0.83 (24)        | 0.13 (24)          | 0.04 (1)           |
| 1.8           | <i>we-g3</i>            | 200                 | 0.46 (92)          | 0.34 (31)        | 0.64 (20)        | 0.1 (20)           | 0                  |
| 1.8           | <i>we-g1/<br/>we-g2</i> | 240                 | 0.43 (104)         | 0.44 (44)        | 0.95 (42)        | 0.17 (42)          | 0.23 (10)          |
| 1.8           | <i>we-g2/<br/>we-g3</i> | 250                 | 0.49 (123)         | 0.53 (58)        | 0.65 (38)        | 0.15 (38)          | 0                  |

**Supplementary Table 2: Survival rates and frequencies of individuals with somatic mutant clones after injecting *we-g* RNPs.**

Numbers represent the percentage of survivors (actual number in parentheses) for a given specific developmental stage relative to number of individuals of the preceding stage (except 7<sup>th</sup> column, which shows the adult survival rate with the respect of the injected embryos). 31 larvae which survived *we-g1* injections (row 1), 5 larvae of *we-g1/we-g2* (row 4) and 13 larvae of *we-g2/we-g3* injections (row 5) were sacrificed for molecular analysis.

| Line           | Sex of founder | <i>we/we<sup>CRISPR</sup></i> flies | <i>we/we<sup>+</sup></i> flies | Transmission rate |
|----------------|----------------|-------------------------------------|--------------------------------|-------------------|
| <i>we-g1#1</i> | M*             | 6                                   | 0                              | <b>1</b>          |
| <i>we-g1#2</i> | M*             | 10                                  | 12                             | 0.45              |
| <i>we-g2#3</i> | F              | 0                                   | 55                             | 0                 |
| <i>we-g2#4</i> | M              | 53                                  | 34                             | 0.6               |
| <i>we-g2#5</i> | M              | 113                                 | 2                              | <b>0.98</b>       |
| <i>we-g2#6</i> | M              | 1                                   | 68                             | 0.01              |
| <i>we-g2#7</i> | M*             | 14                                  | 10                             | 0.58              |

**Supplementary Table 3: Transmission of CRISPR-induced *we* mutations in the germ line.**

From 9 injected G0 flies 7 (RNPs *we-g1* or *we-g2*; see first column) produced progeny with *we* phenotype when crossed to *we/we* mutant partners (*we*= mutant white eye, *we<sup>CRISPR</sup>*= novel mutant *we* alleles, *we<sup>+</sup>* = wild type allele). 2 flies were sterile. The highest transmission rates of CRISPr induced mutant *we* alleles (100% and 98%) are shown in bold. The asterisks indicate G0 founders showing eye mosaicism.

| sgRNAs                        | G0 injected parents | <i>we</i> <sup>CRISPR</sup> flies | <i>we</i> <sup>+</sup> flies | Total adult G1 flies | Mutants frequency |
|-------------------------------|---------------------|-----------------------------------|------------------------------|----------------------|-------------------|
| <i>we-g3</i>                  | 8M x 12F            | 2                                 | 24                           | 26                   | 0.08              |
| <i>we-g2+</i><br><i>we-g3</i> | 18M x 20F           | 3                                 | 181                          | 184                  | 0.02              |

**Supplementary Table 4: Germline transmission of CRISPR-induced *we* mutations.**

Progeny of two families of G0 injected adults are shown. All G0 injected individuals from each of the 2 injection experiments shown in Table 2, were crossed and G1 scored for *we* mutant flies.

| Cas9<br>μg/μl | sgRNA<br>μg/μl | Injected<br>embryos | Larvae/<br>Embyos | Pupae/<br>Larvae | Adults/<br>pupae | Adults/<br>Embryos |
|---------------|----------------|---------------------|-------------------|------------------|------------------|--------------------|
| 0             | 0              | 172                 | 0.46 (80)         | 0.74 (59)        | 0.97 (57)        | 0.33 (57)          |
| 1.8           | 0              | 110                 | 0.57 (63)         | 0.84 (54)        | 0.68 (31)        | 0.28 (31)          |
| 1.8           | prd1<br>0.2    | 164                 | 0.35 (58)         | 0.17 (10)        | 0.8 (8)          | 0.05 (8)           |
| 1.8           | prd1<br>0.2    | 244                 | 0.24 (58)         | 0.5 (29)         | 0.96 (28)        | 0.11 (28)          |

**Supplementary Table 5: Survival rates after injecting of *Ccprd-g1* RNP into syncytial embryos.**

First two rows show the survival rates in the controls with buffer only and with Cas9 only. Numbers represent the percentage of survivors (actual number in parentheses) for a given specific developmental stage relative to number of individuals of the preceding stage. The last column is the adult survival rate with the respect of the injected embryos.

LOCUS GAMC01015788 mRNA

CAGCAGCAGCAGCAATGGCAATATGCCCTTCACCTATTGTTCAACACGCAAACGGACGGTGCTCAGTTT  
GTTGCAGTCAATGGTTGTACATAGTACCCTCCGGTTTTAGTGC GTAATAATTAGTGCTGTCTTAGACTGA  
TAAACAAGAAATAAAAAAAAAATAGAGAAAAATTTGTTGAAGCAGAGCAAATTACGACTCTTTGCCAGCAGAC  
AGCAAGCAAAAAACAAGCAATTACAAAAAAAATACAAAAAACCGAACGAGAAAAATAAAAAATAAAAA  
TTAAGAAAAAAATTTTGCATAAAAAAGTGAAAAAACTGCTAAAAAACTGTTAAAAATTTACAAAAAAA  
AAACATAAAAAAACCCTAAAAGTAGAGACACAGGATAGTAGATACTAAAGCAGTAGAACGCCATAGAGCAA  
AAAAAAAATTCAAATGGGTCAGGAGGATCAGGAGGTGTTAATAAGAGGCGGCAAGGCCACTAGCACATCG  
GCCGAGAGTTTGAATAACAACAACGAGCAGCCCTACGAGCAATCCTCTATAAATCAGGGATTTAGCAAAA  
ATTATGGCACACTCTCACCGCCATCGCCTGCACCTCA**CGCGGATAATCTCACTTACTCT**TTGGTACAATTT  
GGACGTCCTCGGCGCTGTACATCAGCCCGGCTCGAGTTGGAAGCAGCTGGTGAATCGTGTGAAGGGGGTT  
TTCTGCAATGAGCGTCATATACCCGCGCCGCGCAAACATCTCTTGAAAAACGTCTCTGGCGTCGCTTACC  
CCGGTGAATTACTTGTGTAATGGGCAGTTCGGTGCAGGCAAAACTACACTTCTCAATGCGATTGCCTT  
TCGTTTCATCGAAGGGCGTGCAAATTTTCGCCCTCCACCATTTCGCATGCTCAACGGTCATCCCGTTGATGCA  
AAGGAAATGCAGGCACGCTGTGCTTATGTTTCAGCAGGATGATCTTTTTCATTGGTTTCGCTCACCGCACGTG  
AGCATCTTATCTTCCAGGCAATGGTGCATGCCACGGCATATGACACAAAAACAGAAAGTACAACGTGT  
CGATCAAGTTATACAGGACCTCTCGCTGGGTAAATGTCAGAATACGTTGATTGGCGTGCCGGGT**CGGGTG**  
**AAGGGTTTATCGGGTGG**CGAGCGTAAGCGACTGGCATTCGCCTCGGAGGCGTTAACCGATCCGCCGCTAT  
TAATTTGCGATGAACCTACCTCGGGTTTTGGACTCGTTTCATGGCACACAGCGTCGTACAGGTGTTGAAAA  
GCTATCGCAGAAAGGCAAACTGTTATATTGACCATACATCAACCATCCTCGGAGTTATTTGAACTTTTC  
GACAAAATATTACTTTATGGCAGAGGGTAGAGTTGCCTTTTCTGGGTACACCCGGTGAAGCGGTGGACTTTT  
TCTCATACATTGGCGCTACTTGTCCAACCAATTACAACCCAGCAGATTTTTTACGTACAAGTTTTGGCTGT  
AGTACCAGGTCGGGAAGTGAATCACGTGAACGTATAGCCAAGATATGTGATAATTTTGCAGTCGGAAAG  
GTCTCTCGCGAGATGGAGCAAATTTTCAAAGCTGGTTAAGTCCAATGGCTTTGGTAAGGAGGACGAAA  
ACGGATACACATACAAAGCTTCCCTGGTTCATGCAATTCGGTCCGCTACTTTGGCGTTCTTGGCTGTGCGT  
ATTGAAAGAACC GTTATTAGTTAAAGTGCGCCATTACAACGACGATGGTTGCTGTTCTCATTGGACTA  
ATCTTTCTGGGACAACAATTAACCCAAGTCGGTGTATGAACATTAACGGCGCCATTTTCTTGTCTGA  
CCAACATGACTTTCCAAAATTCCTTCGCTACCATAACTGTCTTACCACCGAACTGCCTGTCTTCATGCG  
TGAGACACGTAGTCGTCTGTATCGTTGCGACACTTACTTCTTGGGTAACCATTGCCGAACCTGCCGCTC  
TTCTTGGTGGTACCGTTTCTCTTACCGCCATCGCATATCCTCTCATTGGCTTACGTCCCGGTGTGATC  
ATTTCTTACCCTCTGGCGCTTGTACCTTAGTAGCCAATGTTTCAACTTCCCTTTGGTTATTTGATTTT  
TTGGCTTGTCTGTCGACATCAATGGCTCTATCGGTGGGTCCACCTGTTATTATACCATTTTTTACTTTTT  
GGCGTTTCTTTTTAACTCCGGCTCGGTGCCGGCTACTTTAAATGGTTGTCGTACTTATCATGGTTCC  
GTTATGCCAATGAAGTTTACTGATTAATCAATGGGCAGATGTGAAGCCTGGAGAAATCACTTGCACCTCT  
ATCCAATACCCTTGCCCAAGCTCCGGTGAGGTTATATTGGAGACTTTGAATTTCTCAGCGAGTGATCTA  
CCATTCGATTTTCATTGGATTGGCGTTGCTGATTGTGGGCTTCCGAATATCCGCTTATATAGCGCTAACTA  
TGCGCGCACGTCGAAAGGAATGAGTGGGGAAGGAGGAATGTCTAGACTATAAGATTTTTTGGTTTTAAAT  
AATTAGTTTTGTACGAACACGCATTTATCATATAATAAATCGATAACTTTGGCAAGTTTATGTTTTATTT  
ACTCTAAATGGCATTGCAATGGAGCTGTAAACAAA

**Supplementary Fig. 1.** Partial cDNA sequence of *we*. Positions of *we-g1*, *we-g2* and *we-g-sgRNAs* are shown in bold with the PAM in red.
